# Supplementary material for: Modulation of energy levels by donor groups: an effective approach for optimizing the efficiency of zinc-porphyrin based solar cells
Source: Royal Society of Chemistry journal article supplement (doi:10.1039/c2jm16804a), 2012-01-01
Supplement: c2jm16804a.pdf [file c2jm16804a.pdf]

## *Supporting Information for*

### **Modulation of the energy levels by the variation of the donor: an efficient approach for elevating the efficiency of Zinc-porphyrin based solar cells**

**Bo Liu, Weihong Zhu<sup>\*</sup>, Yueqiang Wang, Wenjun Wu, Xin Li, Baoqin Chen, Yi-Tao Long, Yongshu Xie<sup>\*</sup>**

Key Laboratory for Advanced Materials and Institute of Fine Chemicals, East China University of Science & Technology, Shanghai 200237.

**\*Corresponding Author: *Yongshu Xie***

**Telephone number: (86)-21-64250772**

**E-mail address: [yshxie@ecust.edu.cn](mailto:yshxie@ecust.edu.cn)**

#### **Table of contents**

|                                                                                                                       |     |
|-----------------------------------------------------------------------------------------------------------------------|-----|
| <b>Fig. 1</b> The <sup>1</sup> H NMR spectrum of <b>1a</b> in CDCl <sub>3</sub>                                       | S3  |
| <b>Fig. 2</b> HRMS of <b>1a</b> in MeOH                                                                               | S3  |
| <b>Fig. 3</b> The <sup>1</sup> H NMR spectrum of <b>2a</b> in CDCl <sub>3</sub>                                       | S4  |
| <b>Fig. 4</b> HRMS of <b>2a</b> in MeOH                                                                               | S4  |
| <b>Fig. 5</b> The <sup>1</sup> H NMR spectrum of <b>3a</b> in CDCl <sub>3</sub>                                       | S5  |
| <b>Fig. 6</b> HRMS of <b>3a</b> in MeOH                                                                               | S5  |
| <b>Fig. 7</b> The <sup>1</sup> H NMR spectrum of <b>4a</b> in DMSO- <i>d</i> <sub>6</sub> : CDCl <sub>3</sub> = 3 : 1 | S6  |
| <b>Fig. 8</b> HRMS of <b>4a</b> in MeOH                                                                               | S6  |
| <b>Fig. 9</b> The <sup>1</sup> H NMR spectrum of <b>T2P</b> in DMSO- <i>d</i> <sub>6</sub>                            | S7  |
| <b>Fig. 10</b> HRMS of <b>T2P</b> in MeOH                                                                             | S7  |
| <b>Fig. 11</b> The <sup>1</sup> H NMR spectrum of <b>1b</b> in CDCl <sub>3</sub>                                      | S8  |
| <b>Fig. 12</b> HRMS of <b>1b</b> in MeOH                                                                              | S8  |
| <b>Fig. 13</b> The <sup>1</sup> H NMR spectrum of <b>2b</b> in CDCl <sub>3</sub>                                      | S9  |
| <b>Fig. 14</b> HRMS of <b>2b</b> in MeOH                                                                              | S9  |
| <b>Fig. 15</b> The <sup>1</sup> H NMR spectrum of <b>3b</b> in CDCl <sub>3</sub>                                      | S10 |
| <b>Fig. 16</b> HRMS of <b>3b</b> in MeOH                                                                              | S10 |
| <b>Fig. 17</b> The <sup>1</sup> H NMR spectrum of <b>4b</b> in DMSO- <i>d</i> <sub>6</sub>                            | S11 |
| <b>Fig. 18</b> HRMS of <b>4b</b> in MeOH                                                                              | S11 |
| <b>Fig. 19</b> The <sup>1</sup> H NMR spectrum of <b>MT2P</b> in DMSO- <i>d</i> <sub>6</sub>                          | S12 |
| <b>Fig. 20</b> HRMS of <b>MT2P</b> in MeOH                                                                            | S12 |
| <b>Fig. 21</b> The <sup>1</sup> H NMR spectrum of <b>1c</b> in CDCl <sub>3</sub>                                      | S13 |
| <b>Fig. 22</b> HRMS of <b>1c</b> in MeOH                                                                              | S13 |
| <b>Fig. 23</b> The <sup>1</sup> H NMR spectrum of <b>2c</b> in CDCl <sub>3</sub>                                      | S14 |
| <b>Fig. 24</b> HRMS of <b>2c</b> in MeOH                                                                              | S14 |
| <b>Fig. 25</b> The <sup>1</sup> H NMR spectrum of <b>3c</b> in CDCl <sub>3</sub>                                      | S15 |
| <b>Fig. 26</b> HRMS of <b>3c</b> in MeOH                                                                              | S15 |
| <b>Fig. 27</b> The <sup>1</sup> H NMR spectrum of <b>4c</b> in DMSO- <i>d</i> <sub>6</sub>                            | S16 |

|                                                                                                                         |     |
|-------------------------------------------------------------------------------------------------------------------------|-----|
| <b>Fig. 28</b> HRMS of <b>4c</b> in MeOH                                                                                | S16 |
| <b>Fig. 29</b> The <sup>1</sup> H NMR spectrum of <b>T3P</b> in DMSO- <i>d</i> <sub>6</sub> : CDCl <sub>3</sub> = 5 : 1 | S17 |
| <b>Fig. 30</b> HRMS of <b>T3P</b> in MeOH                                                                               | S17 |
| <b>Fig. 31</b> The <sup>1</sup> H NMR spectrum of <b>1d</b> in CDCl <sub>3</sub>                                        | S18 |
| <b>Fig. 32</b> HRMS of <b>1d</b> in MeOH                                                                                | S18 |
| <b>Fig. 33</b> The <sup>1</sup> H NMR spectrum of <b>2d</b> in CDCl <sub>3</sub>                                        | S19 |
| <b>Fig. 34</b> HRMS of <b>2d</b> in MeOH                                                                                | S19 |
| <b>Fig. 35</b> The <sup>1</sup> H NMR spectrum of <b>3d</b> in CDCl <sub>3</sub>                                        | S20 |
| <b>Fig. 36</b> HRMS of <b>3d</b> in MeOH                                                                                | S20 |
| <b>Fig. 37</b> The <sup>1</sup> H NMR spectrum of <b>4d</b> in DMSO- <i>d</i> <sub>6</sub>                              | S21 |
| <b>Fig. 38</b> HRMS of <b>4d</b> in MeOH                                                                                | S21 |
| <b>Fig. 39</b> The <sup>1</sup> H NMR spectrum of <b>MT3P</b> in DMSO- <i>d</i> <sub>6</sub>                            | S22 |
| <b>Fig. 40</b> HRMS of <b>MT3P</b> in MeOH                                                                              | S22 |
| <b>Fig. 41</b> The <sup>1</sup> H NMR spectrum of <b>1e</b> in CDCl <sub>3</sub>                                        | S23 |
| <b>Fig. 42</b> HRMS of <b>1e</b> in MeOH                                                                                | S23 |
| <b>Fig. 43</b> The <sup>1</sup> H NMR spectrum of <b>2e</b> in CDCl <sub>3</sub>                                        | S24 |
| <b>Fig. 44</b> HRMS of <b>2e</b> in MeOH                                                                                | S24 |
| <b>Fig. 45</b> The <sup>1</sup> H NMR spectrum of <b>3e</b> in CDCl <sub>3</sub>                                        | S25 |
| <b>Fig. 46</b> HRMS of <b>3e</b> in MeOH                                                                                | S25 |
| <b>Fig. 47</b> The <sup>1</sup> H NMR spectrum of <b>4e</b> in CDCl <sub>3</sub>                                        | S26 |
| <b>Fig. 48</b> HRMS of <b>4e</b> in MeOH                                                                                | S26 |
| <b>Fig. 49</b> The <sup>1</sup> H NMR spectrum of <b>M3T2P</b> in DMSO- <i>d</i> <sub>6</sub>                           | S27 |
| <b>Fig. 50</b> HRMS of <b>M3T2P</b> in MeOH                                                                             | S27 |
| <b>Fig. 51</b> The optimized structures of <b>T2P</b> , <b>T3P</b> , <b>MT2P</b> , <b>MT3P</b> and <b>M3T2P</b> dyes    | S27 |

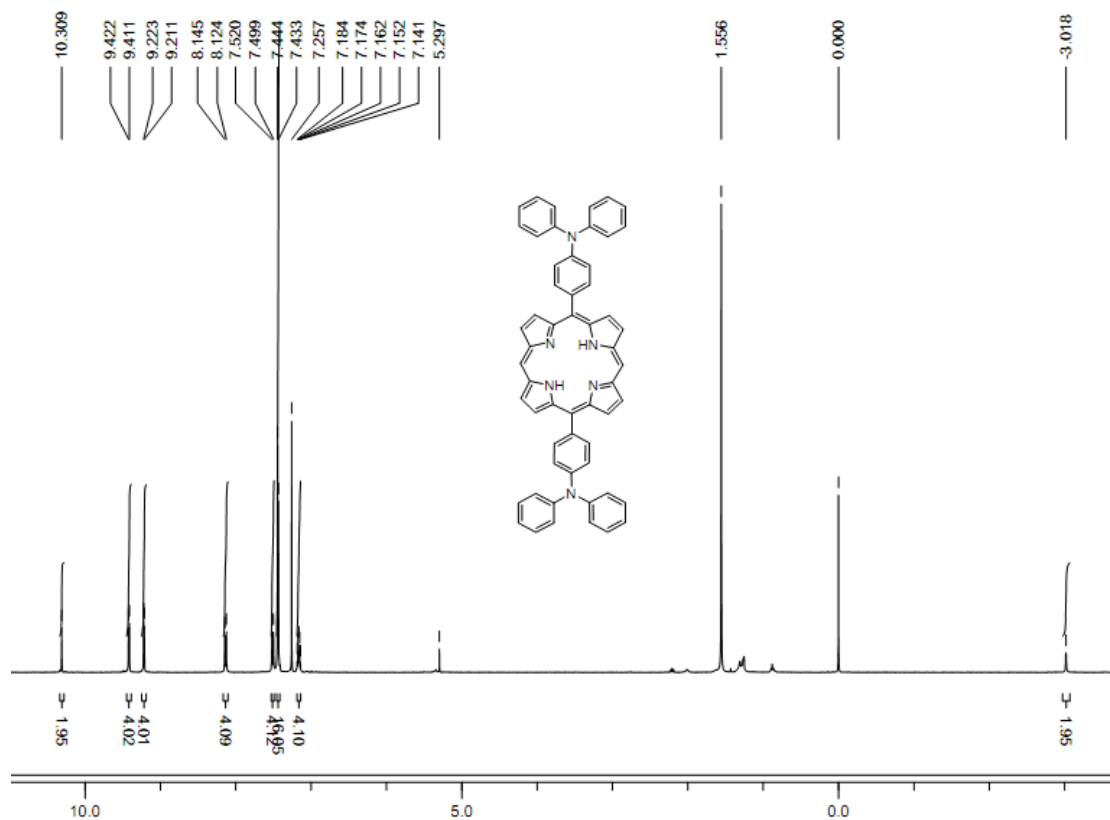

**Fig. 1** The  $^1\text{H}$  NMR spectrum of **1a** in  $\text{CDCl}_3$

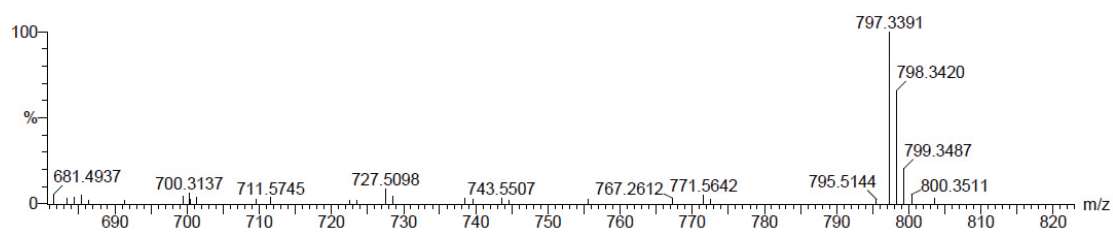

**Fig. 2** HRMS of **1a** in MeOH

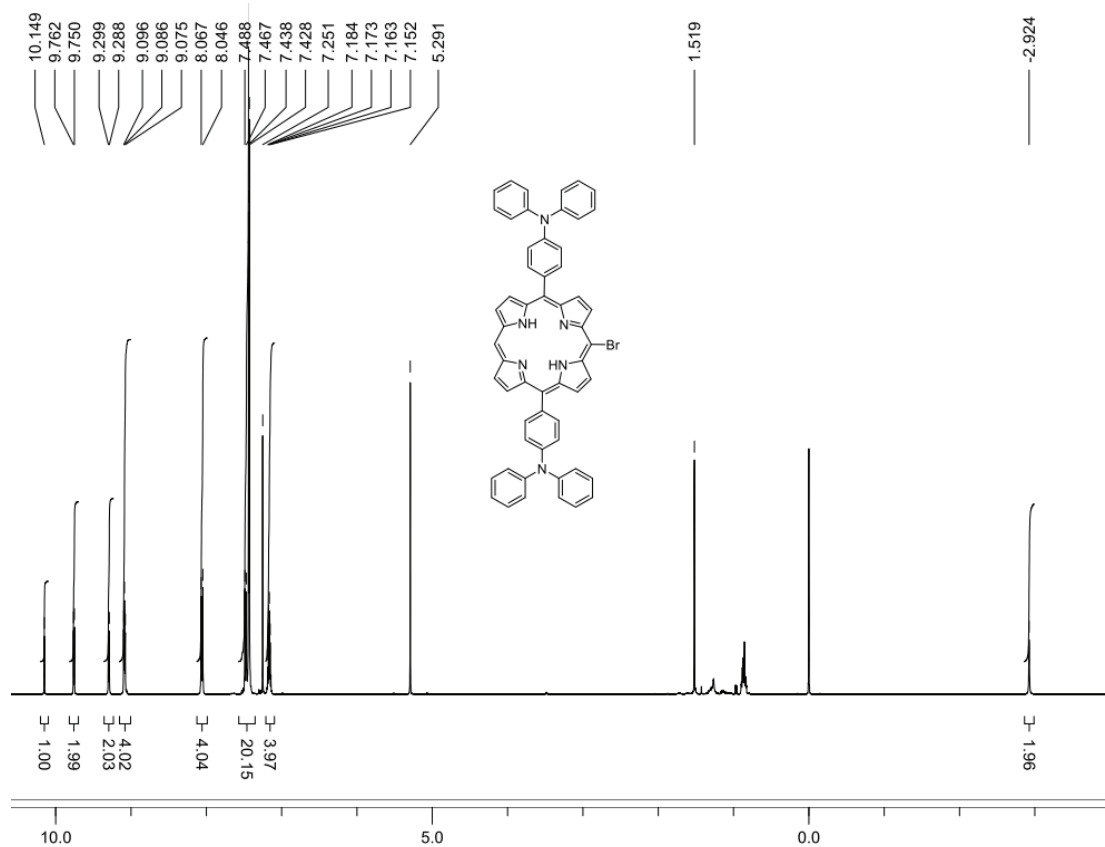

**Fig. 3** The  $^1\text{H}$  NMR spectrum of **2a** in  $\text{CDCl}_3$

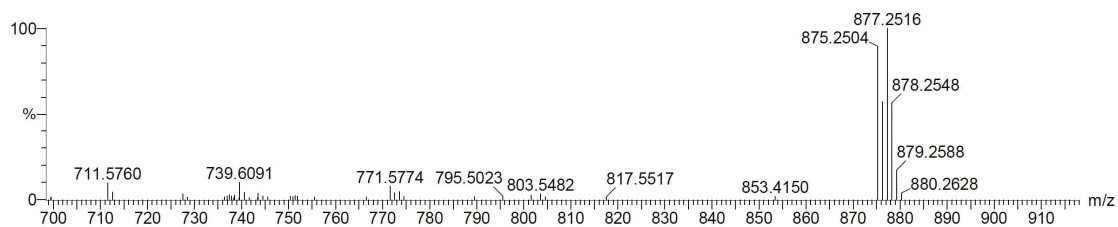

**Fig. 4** HRMS of **2a** in MeOH

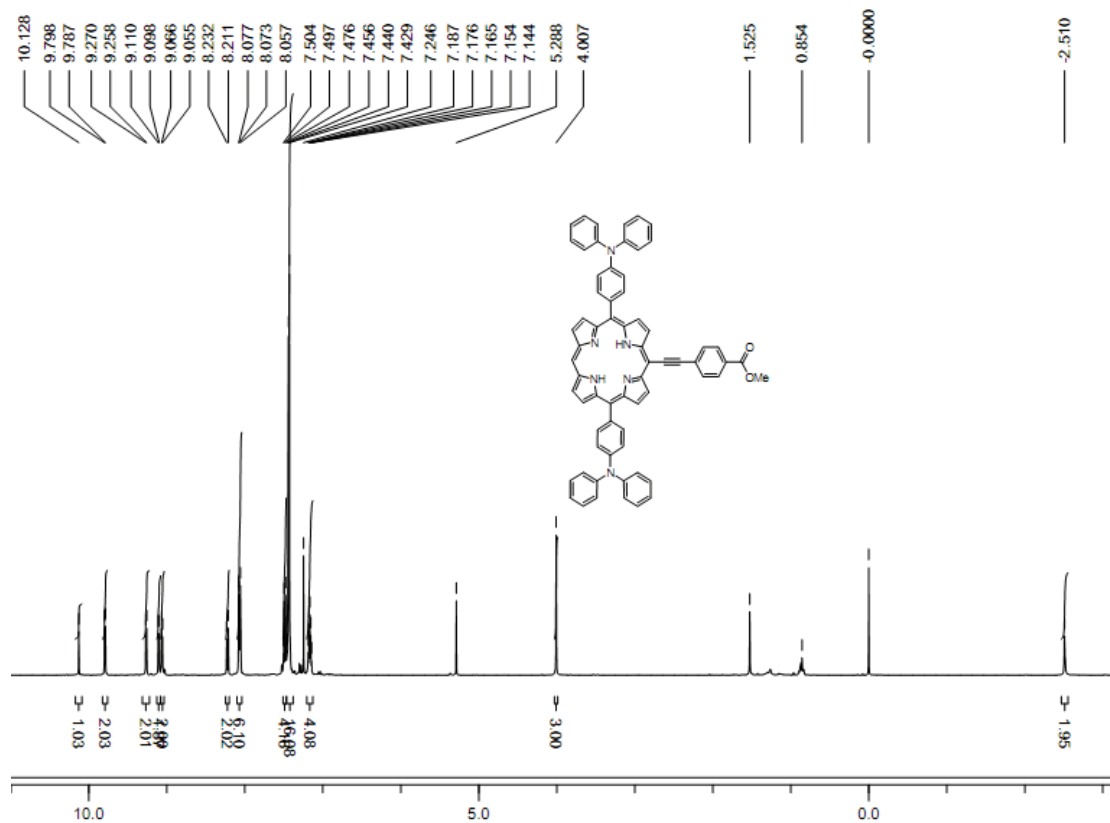

**Fig. 5** The  $^1\text{H}$  NMR spectrum of **3a** in  $\text{CDCl}_3$

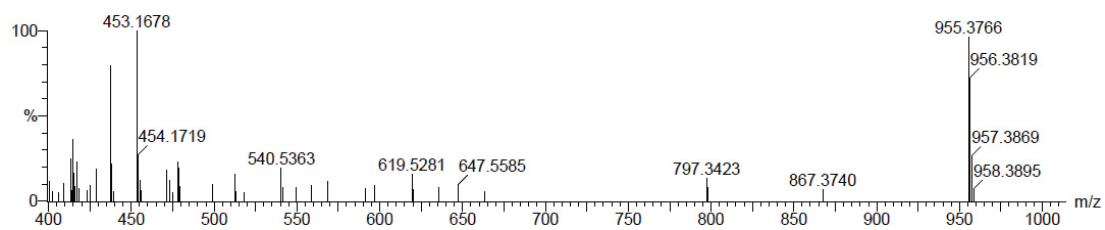

**Fig. 6** HRMS of **3a** in MeOH

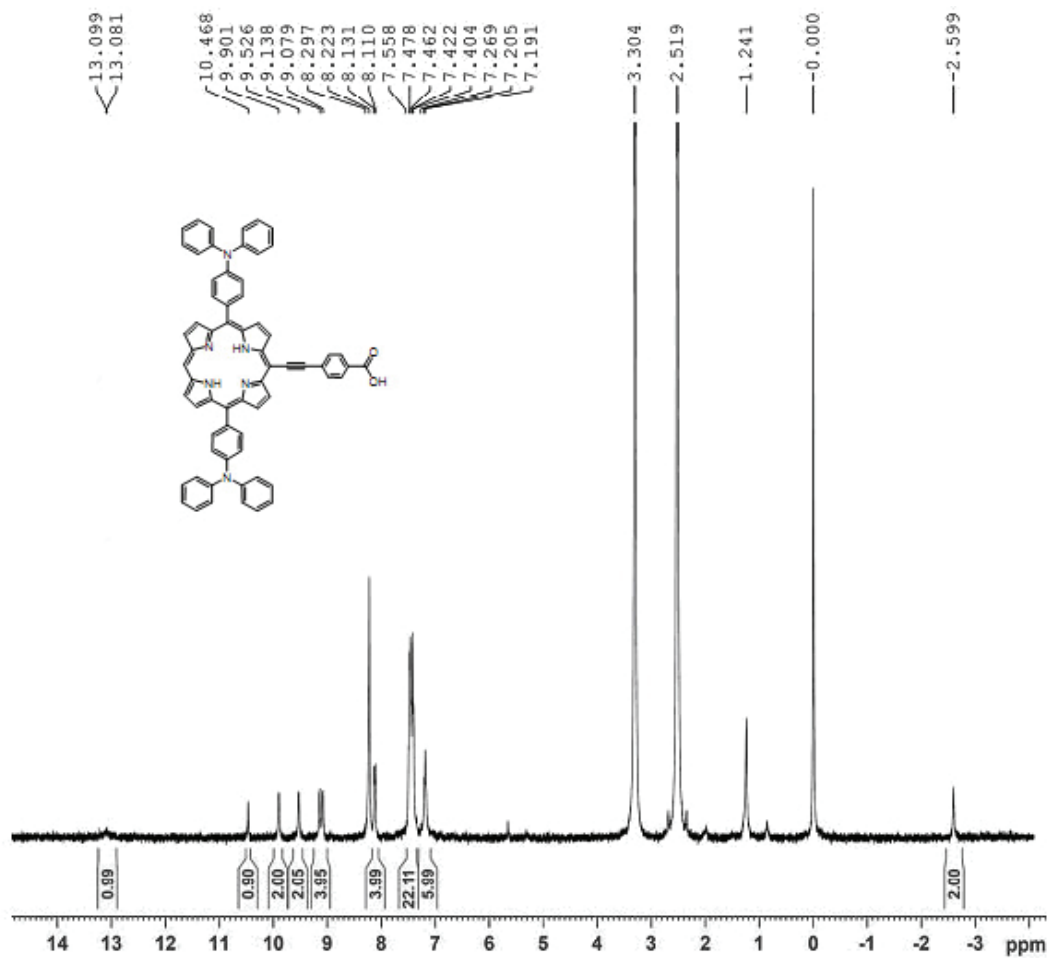

**Fig. 7** The <sup>1</sup>H NMR spectrum of **4a** in DMSO-*d*<sub>6</sub> : CDCl<sub>3</sub> = 3 : 1

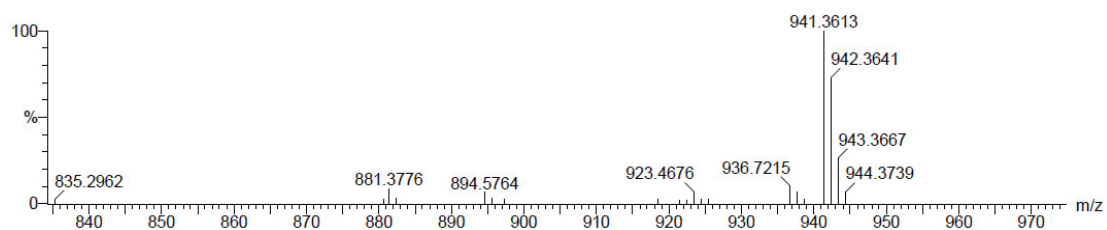

**Fig. 8** HRMS of **4a** in MeOH

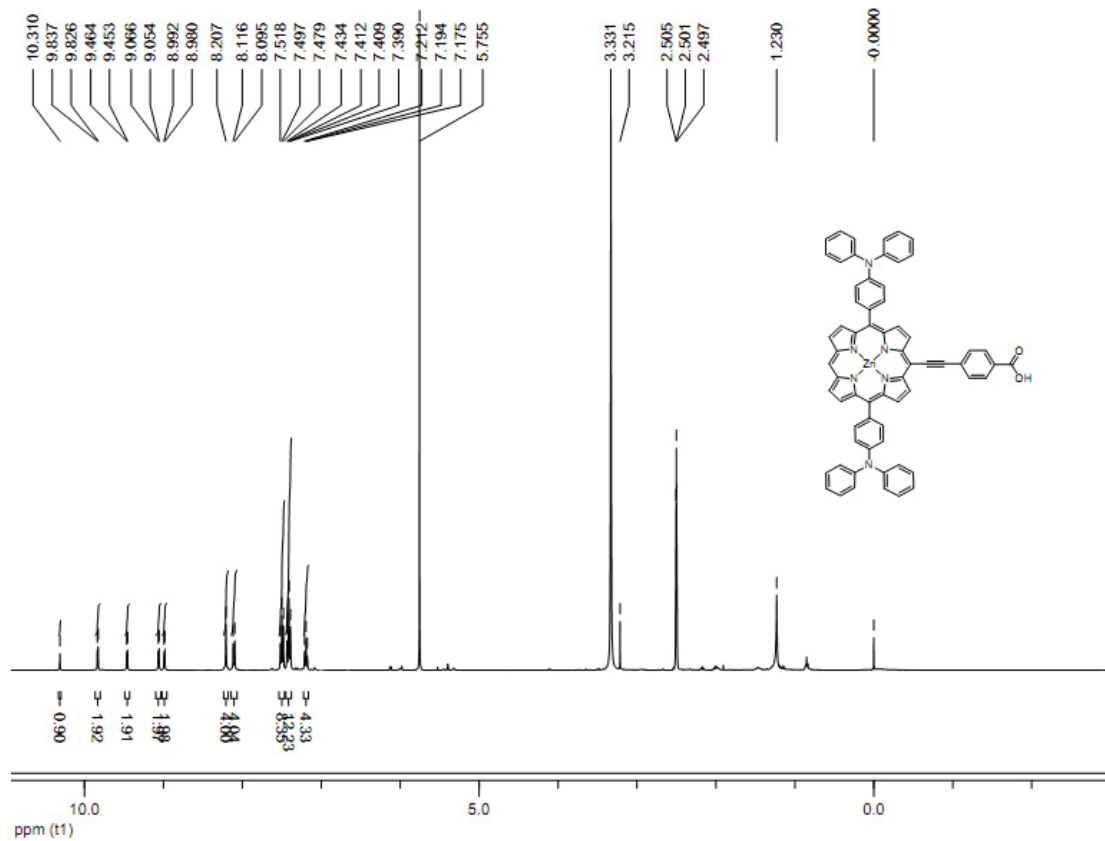

**Fig. 9** The  $^1\text{H}$  NMR spectrum of T2P in  $\text{DMSO-}d_6$

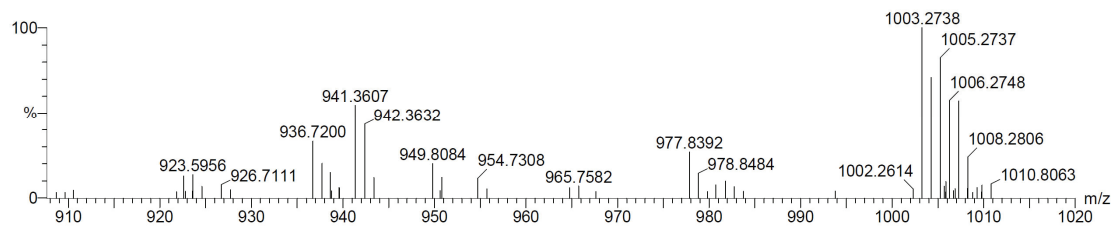

**Fig. 10** HRMS of T2P in MeOH

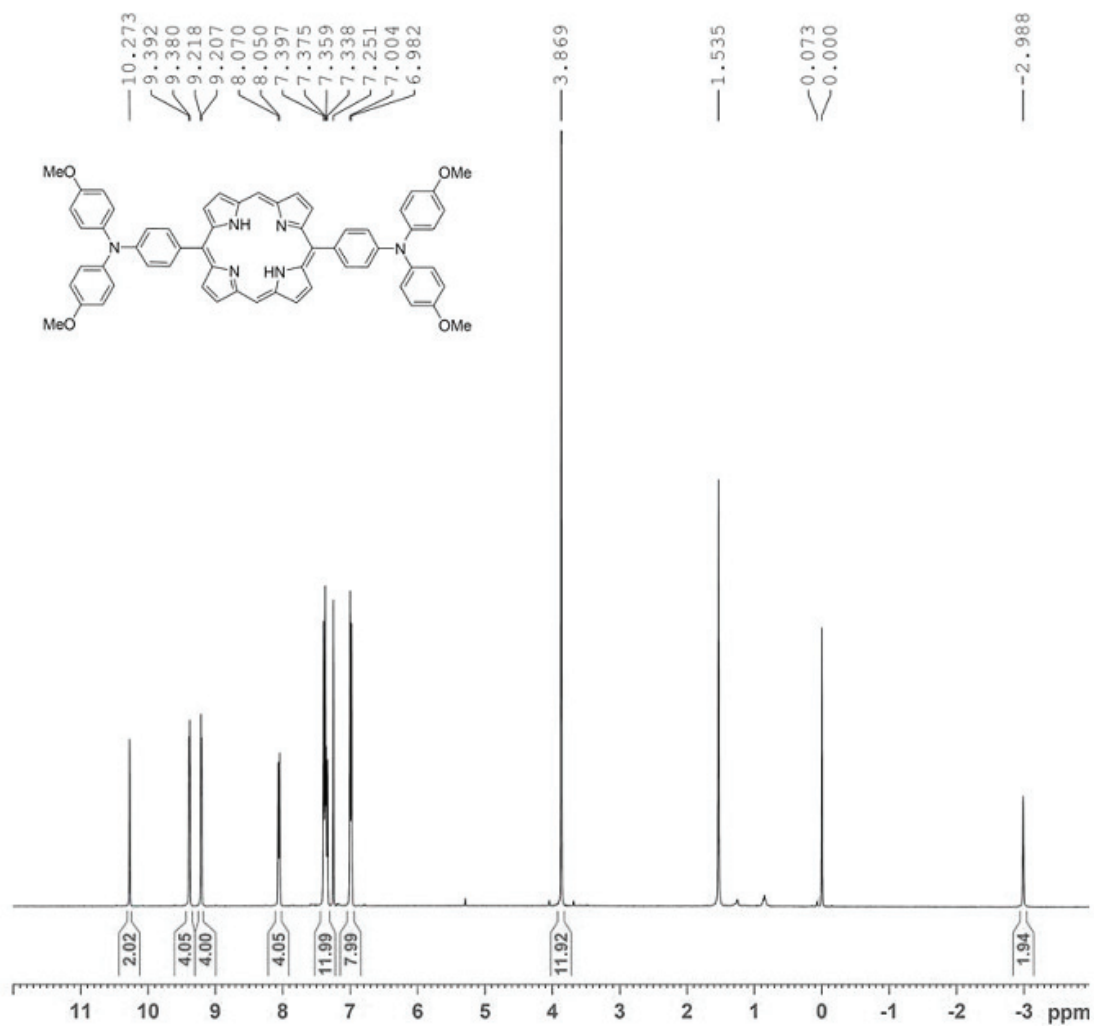

**Fig. 11** The <sup>1</sup>H NMR spectrum of **1b** in CDCl<sub>3</sub>

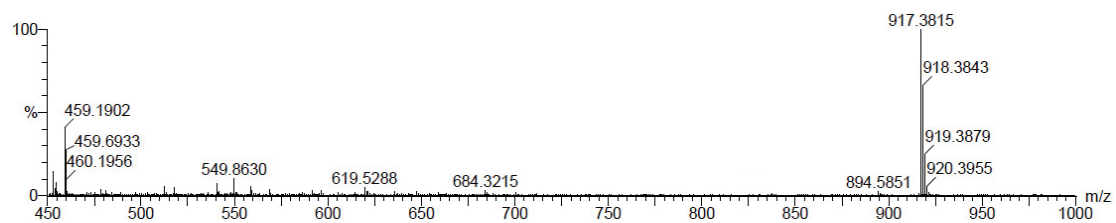

**Fig. 12** HRMS of **1b** in MeOH



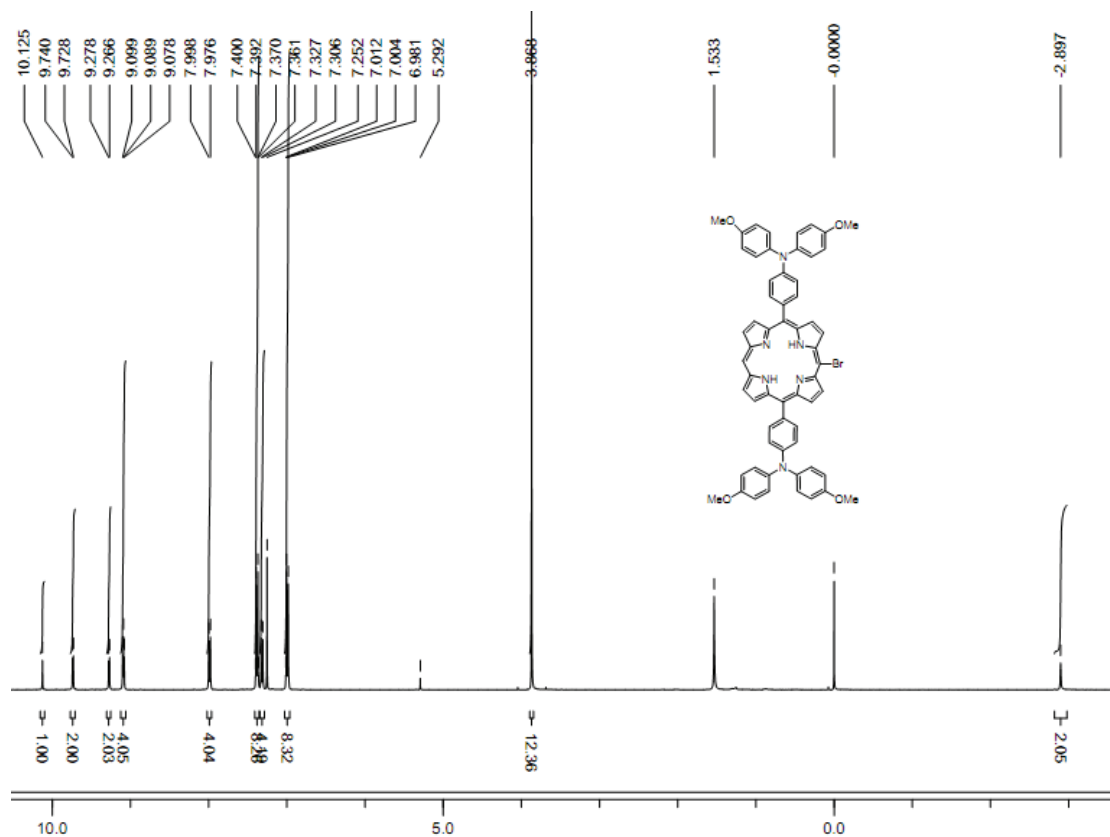

**Fig. 13** The  $^1\text{H}$  NMR spectrum of **2b** in  $\text{CDCl}_3$

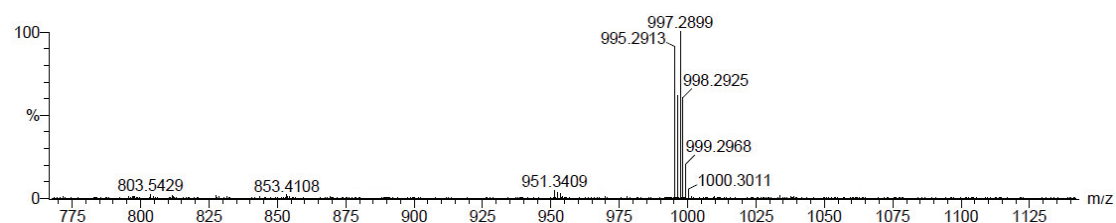

**Fig. 14** HRMS of **2b** in MeOH

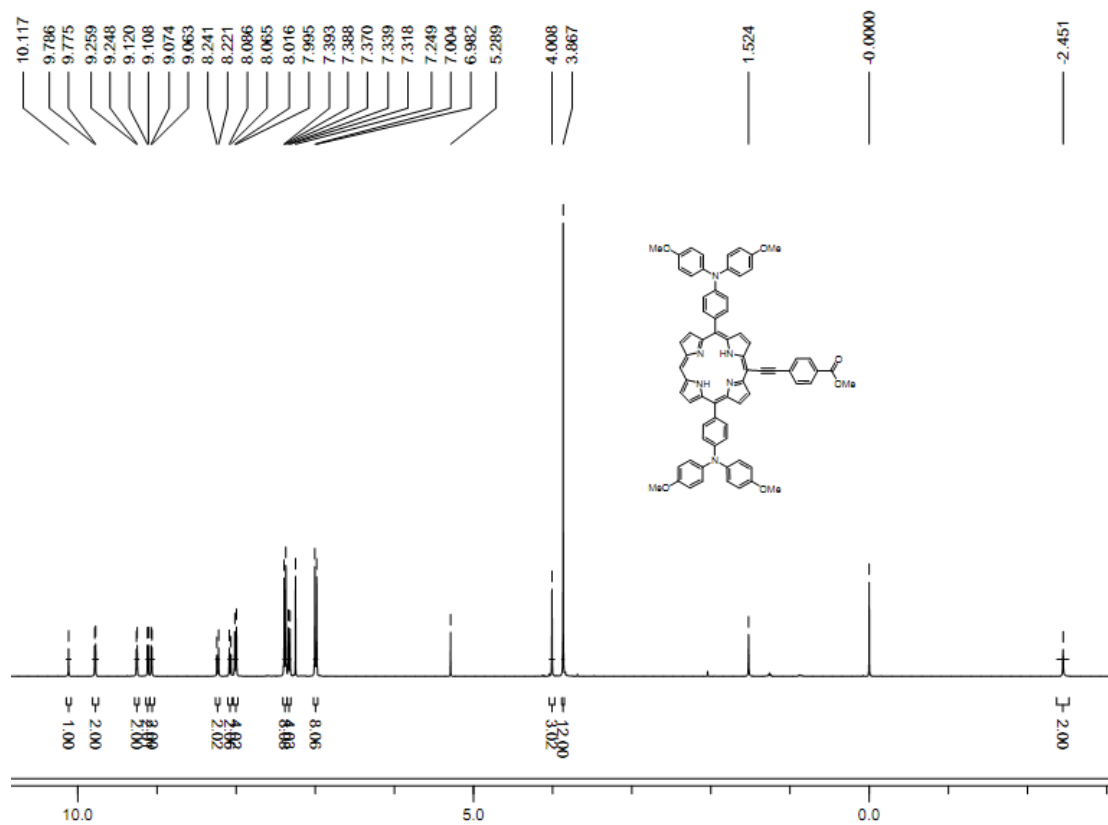

Fig. 15 The  $^1\text{H}$  NMR spectrum of **3b** in  $\text{CDCl}_3$

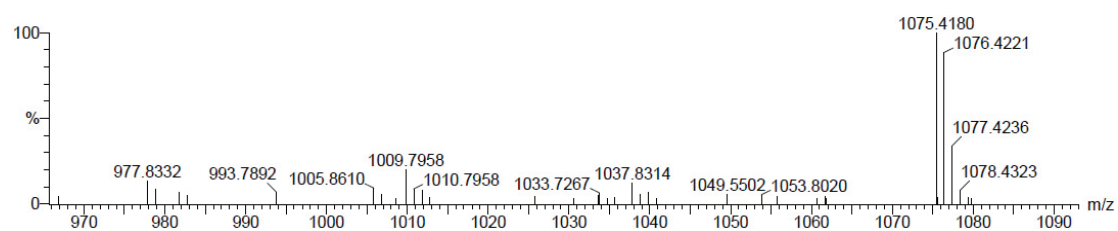

Fig. 16 HRMS of **3b** in  $\text{MeOH}$

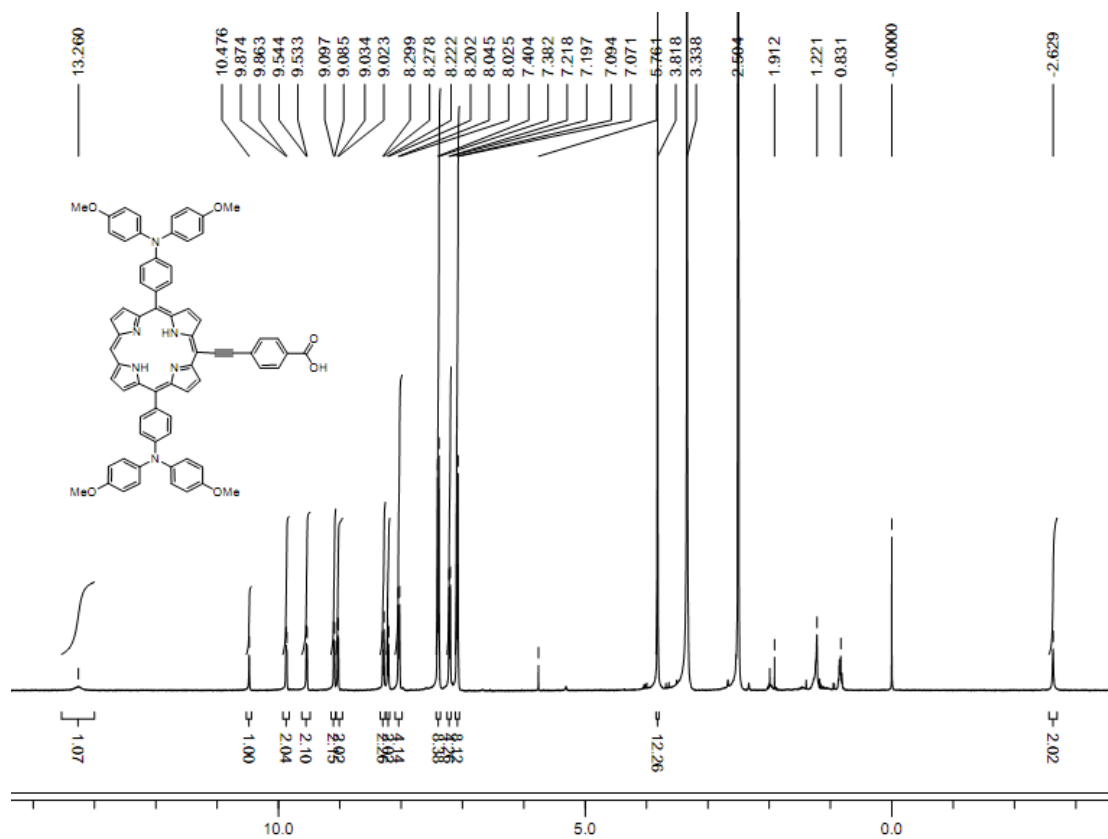

Fig. 17 The  $^1\text{H}$  NMR spectrum of **4b** in  $\text{DMSO-}d_6$

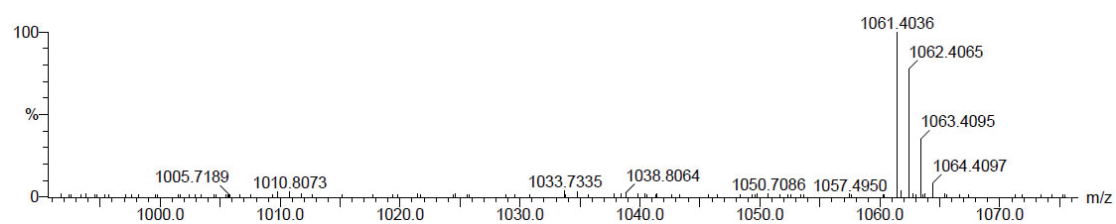

Fig. 18 HRMS of **4b** in MeOH

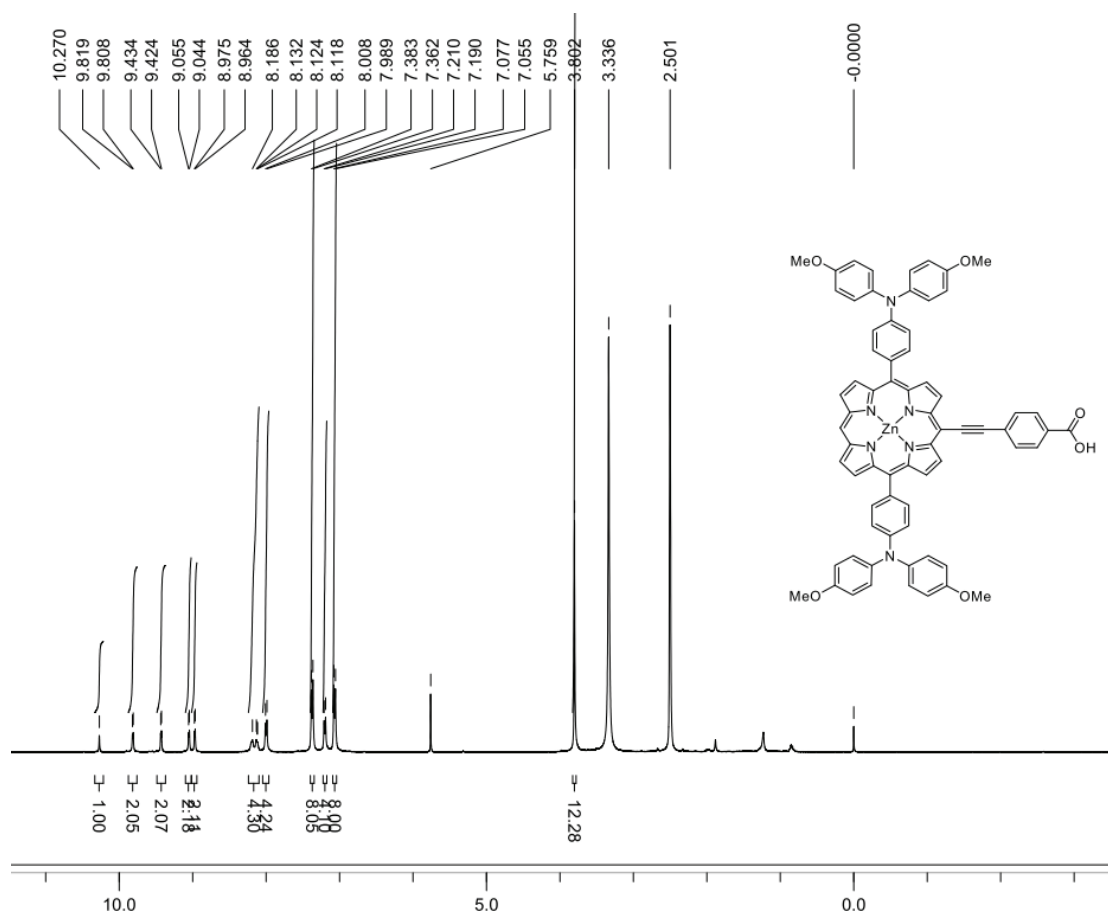

**Fig. 19** The  $^1\text{H}$  NMR spectrum of **MT2P** in  $\text{DMSO-}d_6$

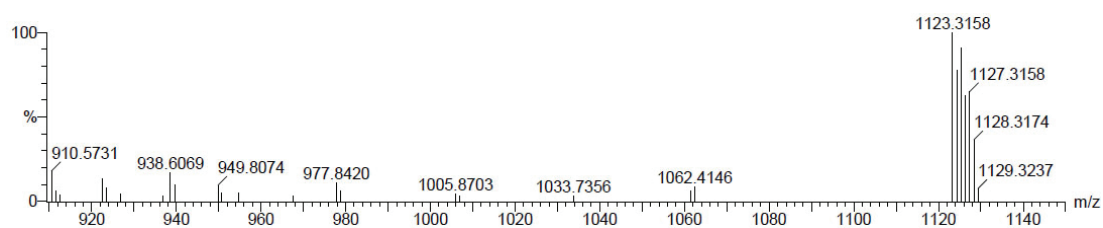

**Fig. 20** HRMS of **MT2P** in MeOH

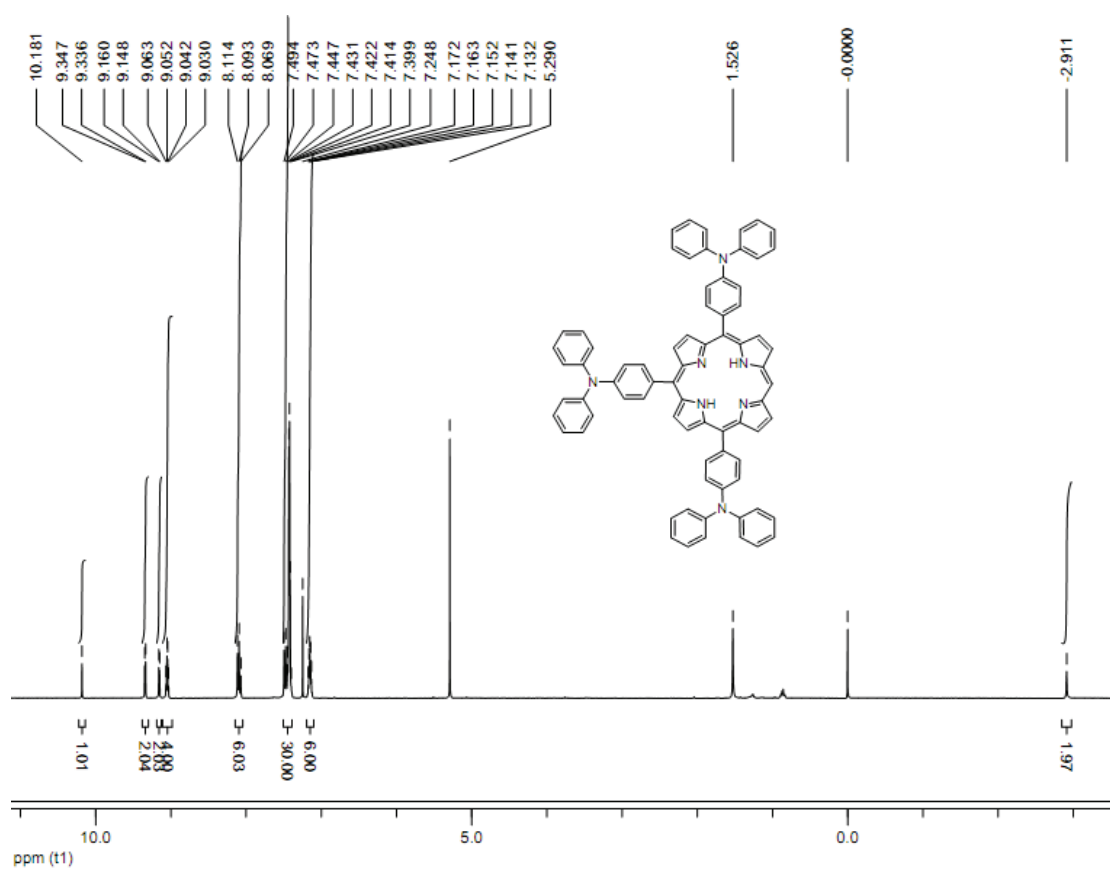

**Fig. 21** The  $^1\text{H}$  NMR spectrum of **1c** in  $\text{CDCl}_3$

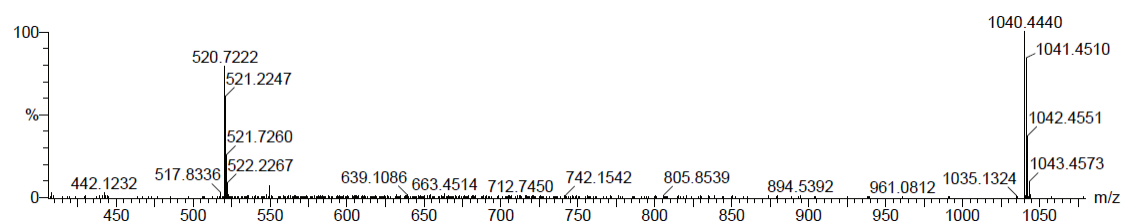

**Fig. 22** HRMS of **1c** in MeOH

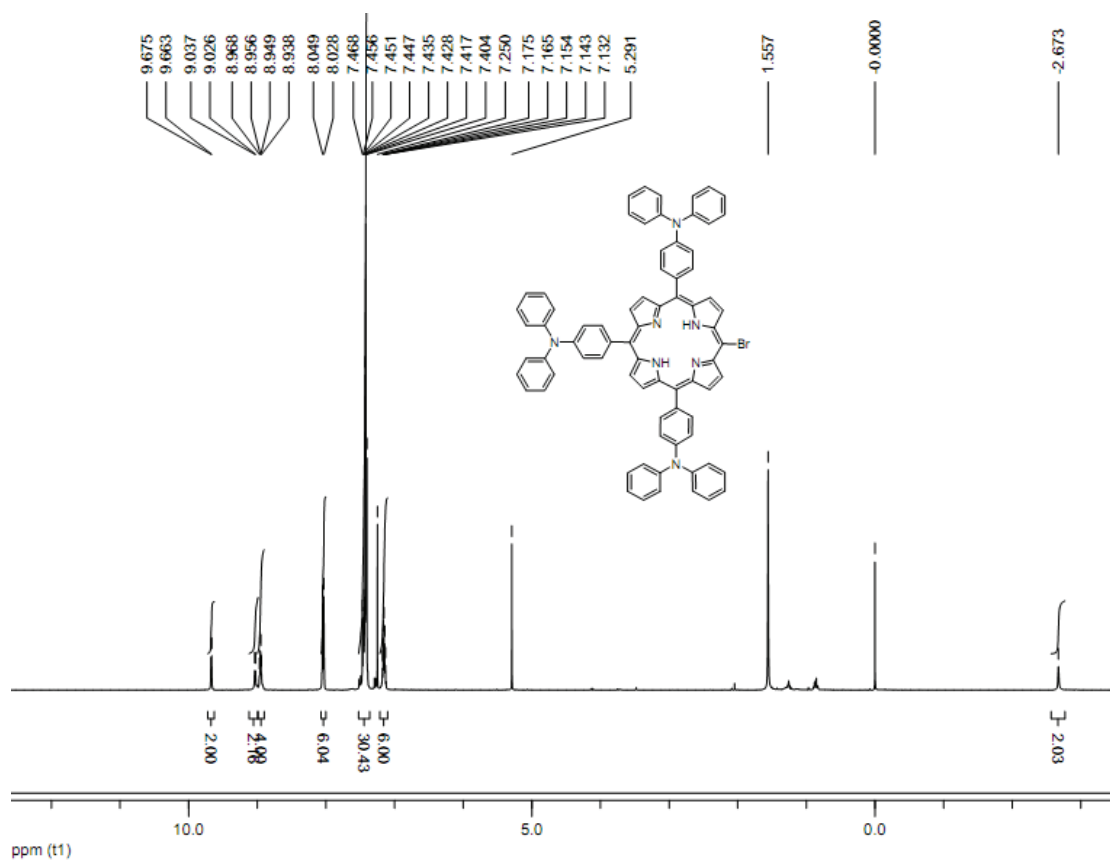

**Fig. 23** The  $^1\text{H}$  NMR spectrum of **2c** in  $\text{CDCl}_3$

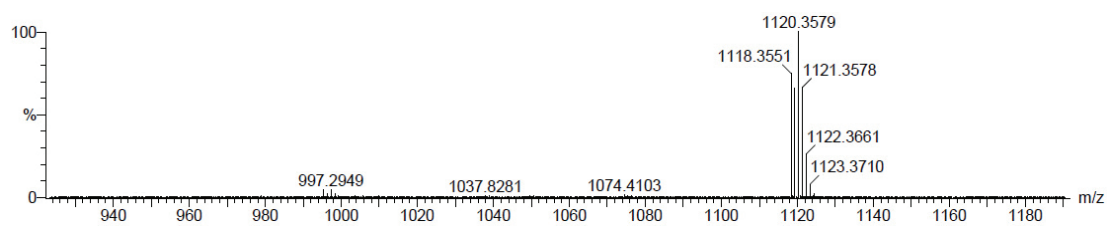

**Fig. 24** HRMS of **2c** in MeOH

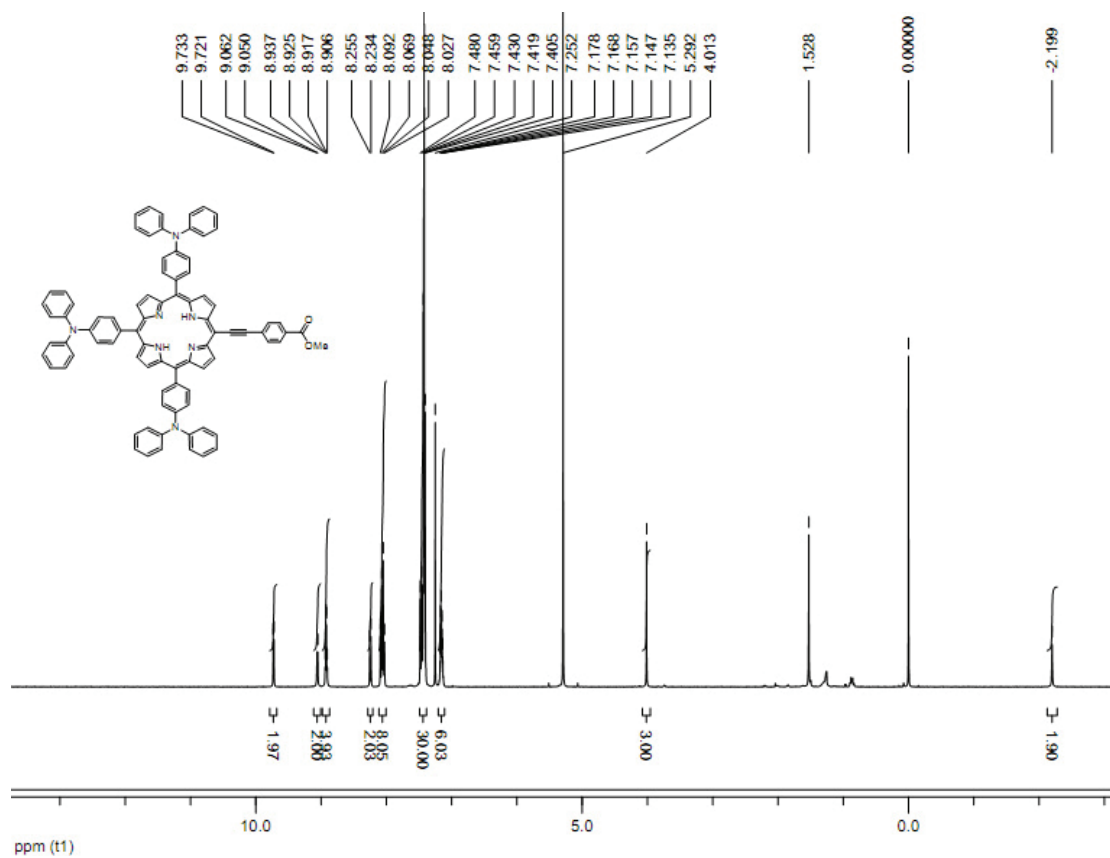

**Fig. 25** The <sup>1</sup>H NMR spectrum of **3c** in CDCl<sub>3</sub>

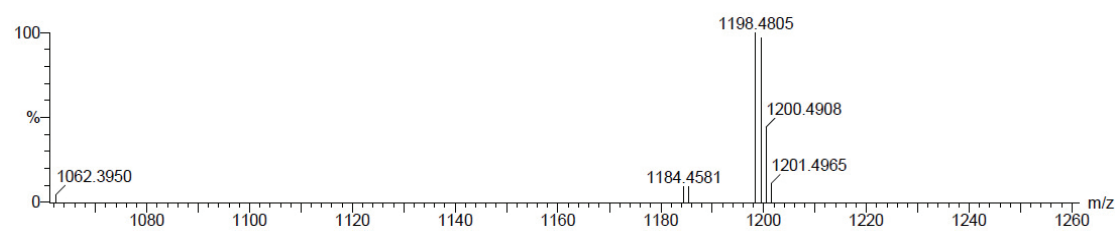

**Fig. 26** HRMS of **3c** in MeOH

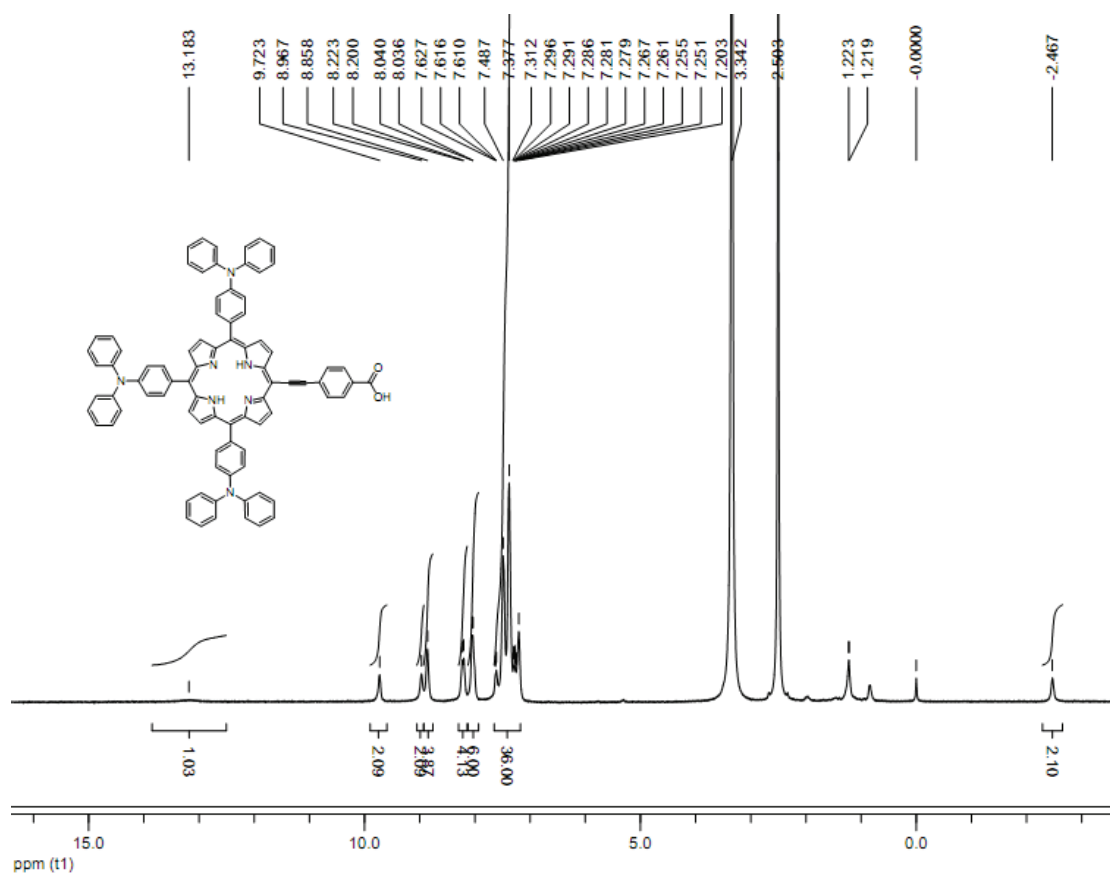

**Fig. 27** The <sup>1</sup>H NMR spectrum of **4c** in DMSO-*d*<sub>6</sub>

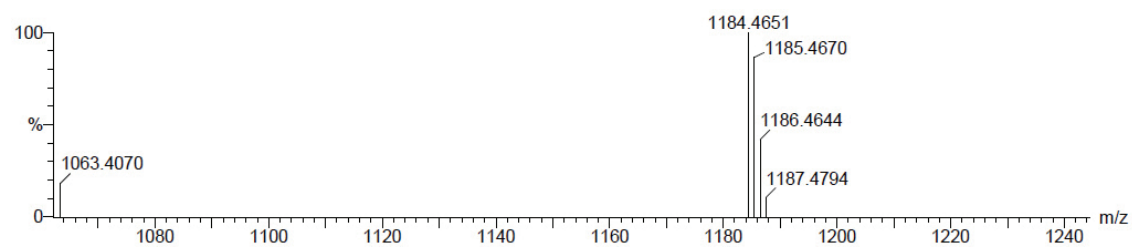

**Fig. 28** HRMS of **4c** in MeOH



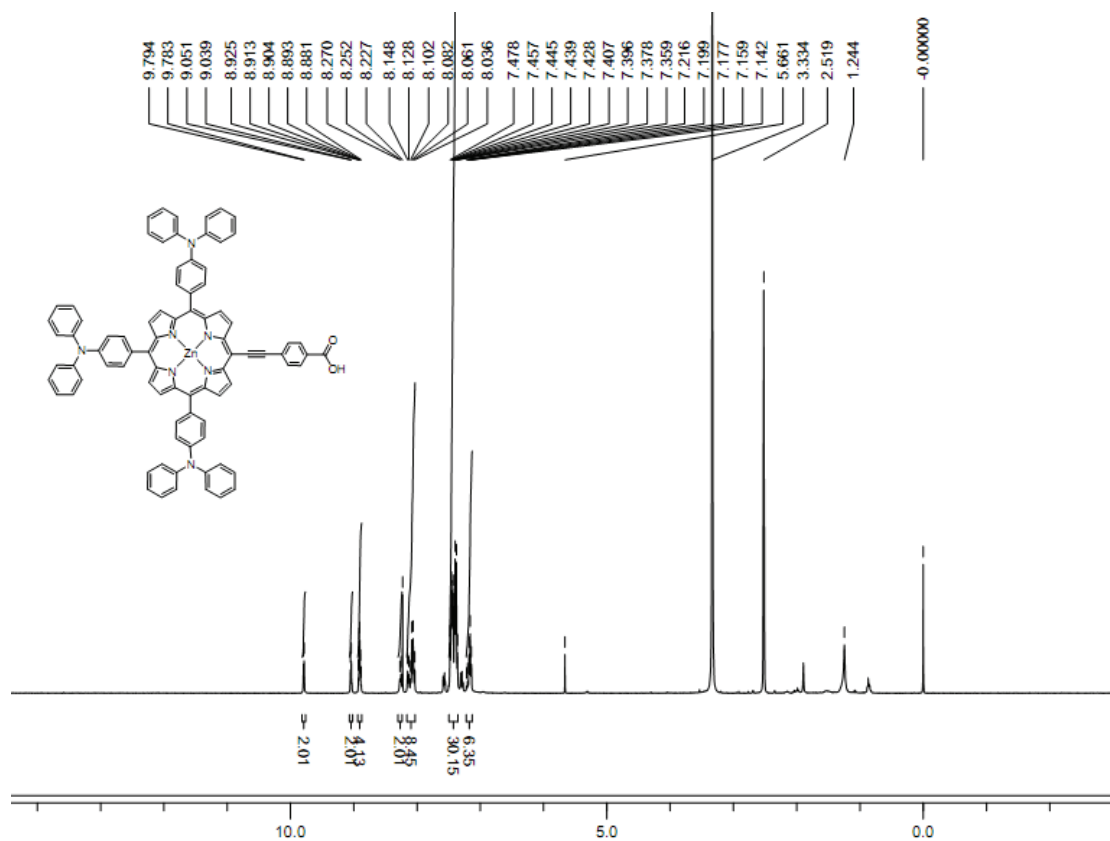

Fig. 29 The <sup>1</sup>H NMR spectrum of T3P in DMSO-*d*<sub>6</sub> : CDCl<sub>3</sub> = 5 : 1

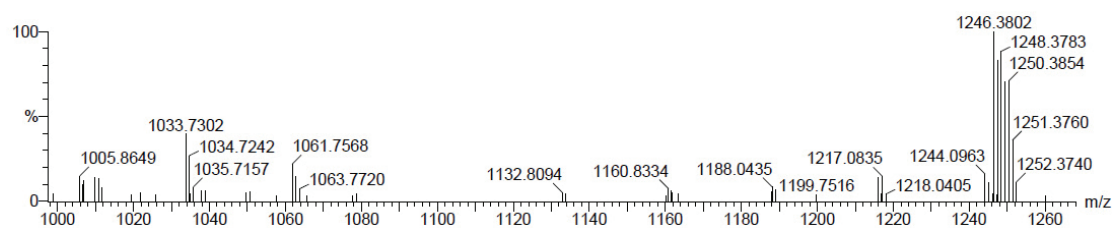

Fig. 30 HRMS of T3P in MeOH

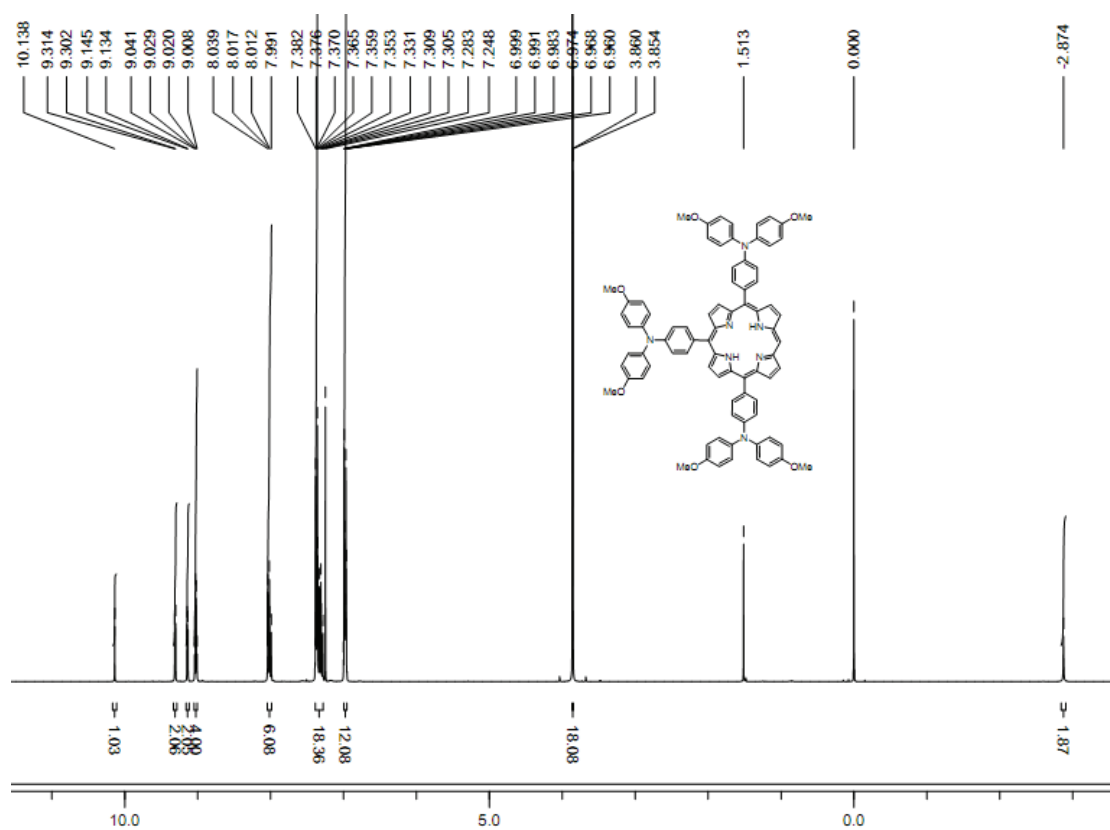

**Fig. 31** The  $^1\text{H}$  NMR spectrum of **1d** in  $\text{CDCl}_3$

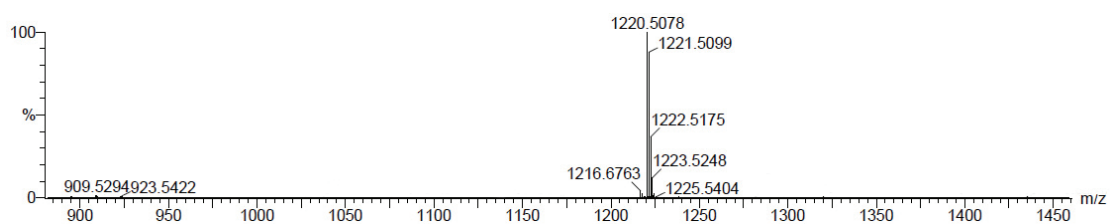

**Fig. 32** HRMS of **1d** in MeOH

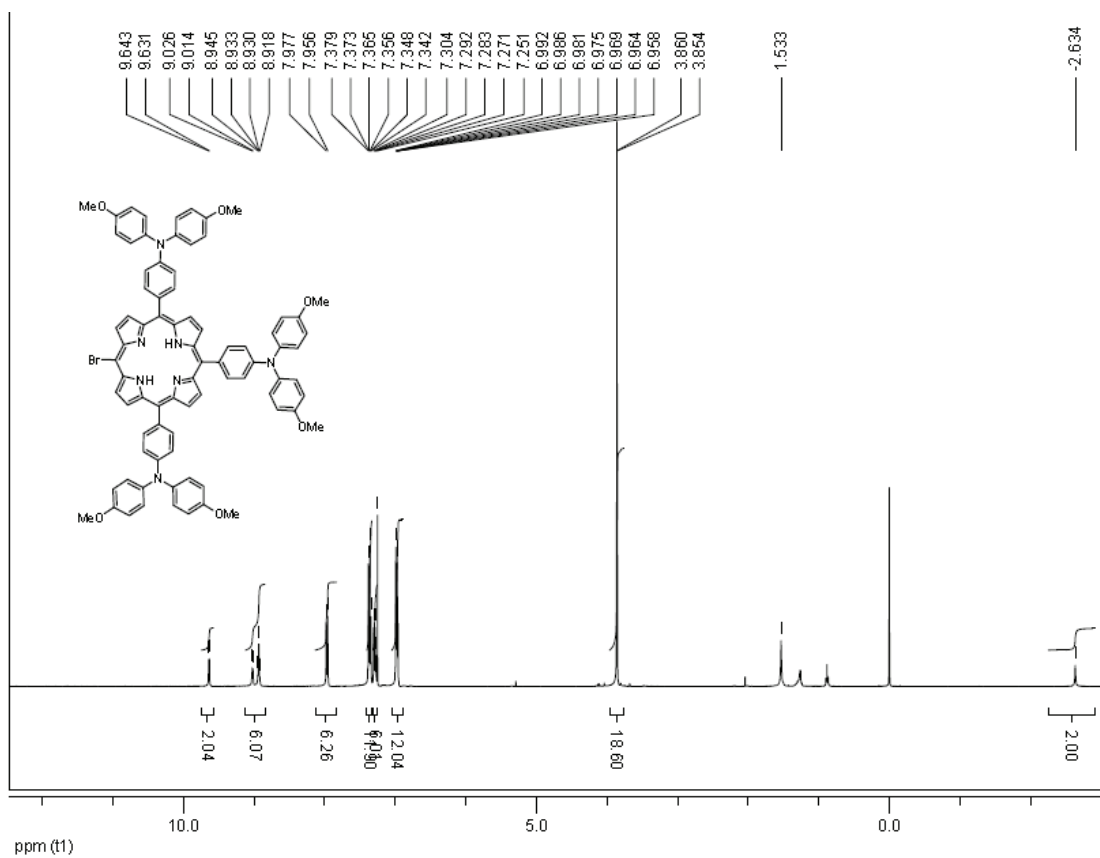

**Fig. 33** The  $^1\text{H}$  NMR spectrum of **2d** in  $\text{CDCl}_3$

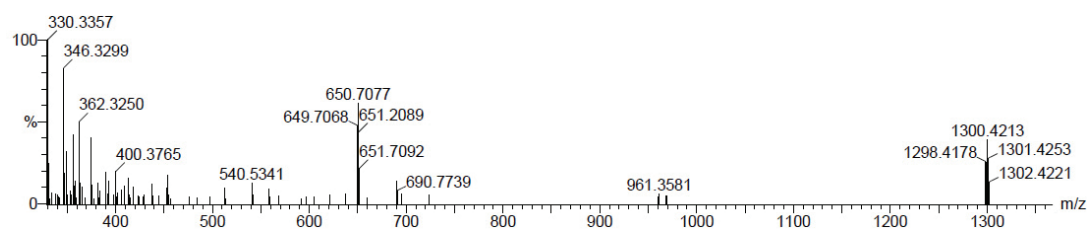

**Fig. 34** HRMS of **2d** in MeOH

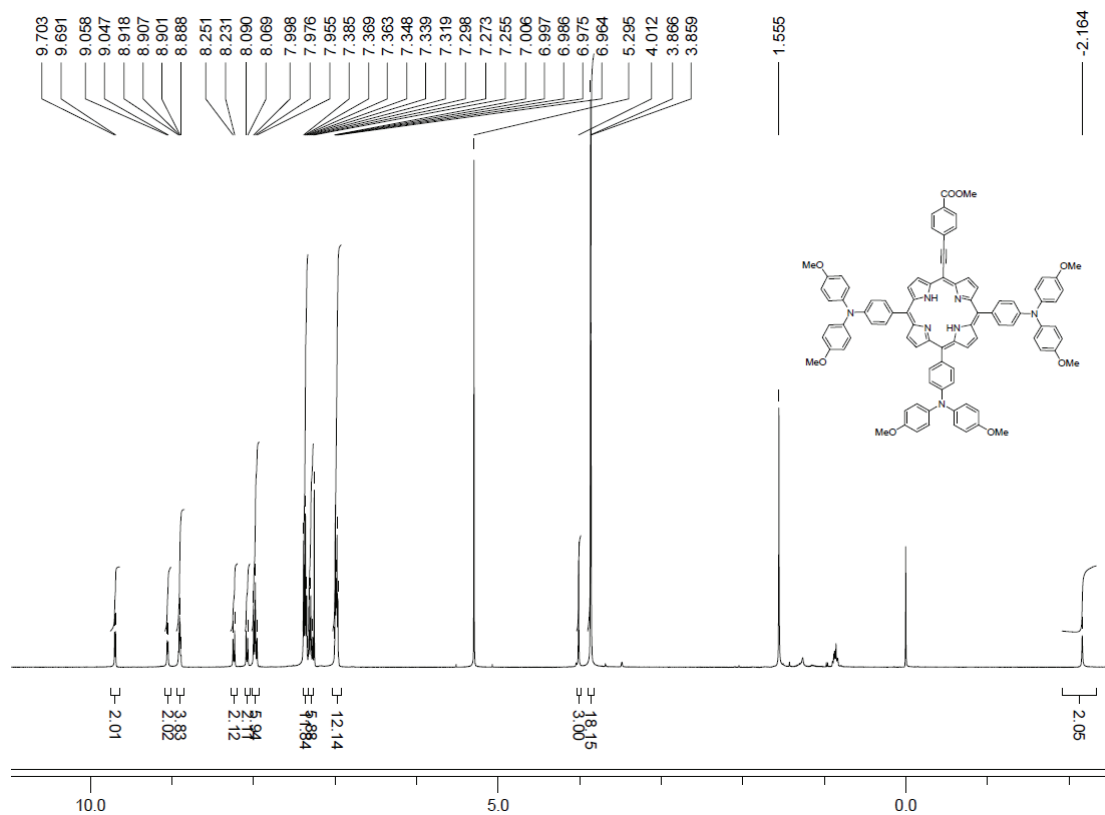

**Fig. 35** The  $^1\text{H}$  NMR spectrum of **3d** in  $\text{CDCl}_3$

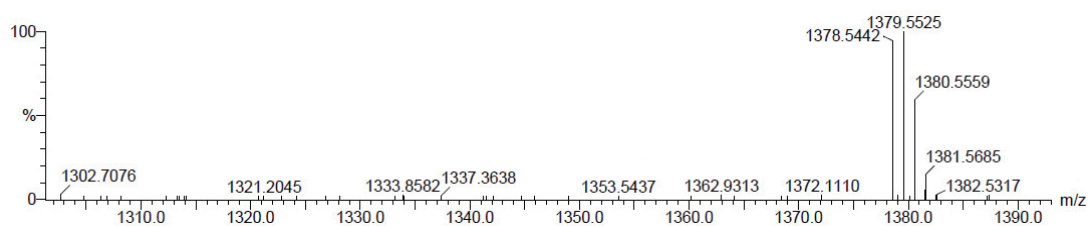

**Fig. 36** HRMS of **3d** in MeOH

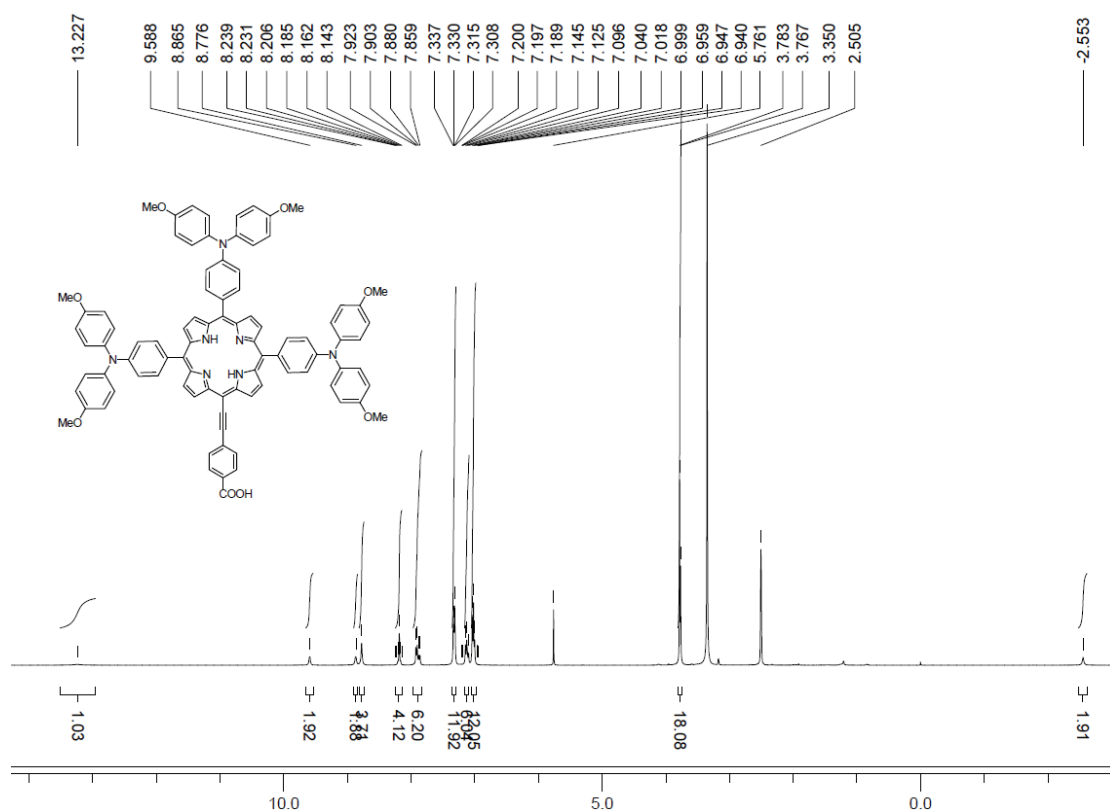

**Fig. 37** The  $^1\text{H}$  NMR spectrum of **4d** in  $\text{DMSO-}d_6$

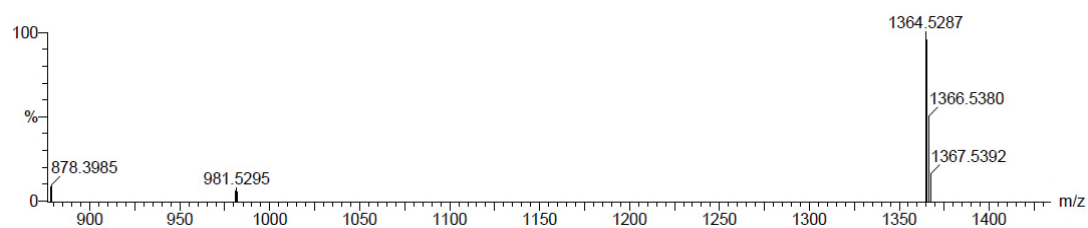

**Fig. 38** HRMS of **4d** in  $\text{MeOH}$

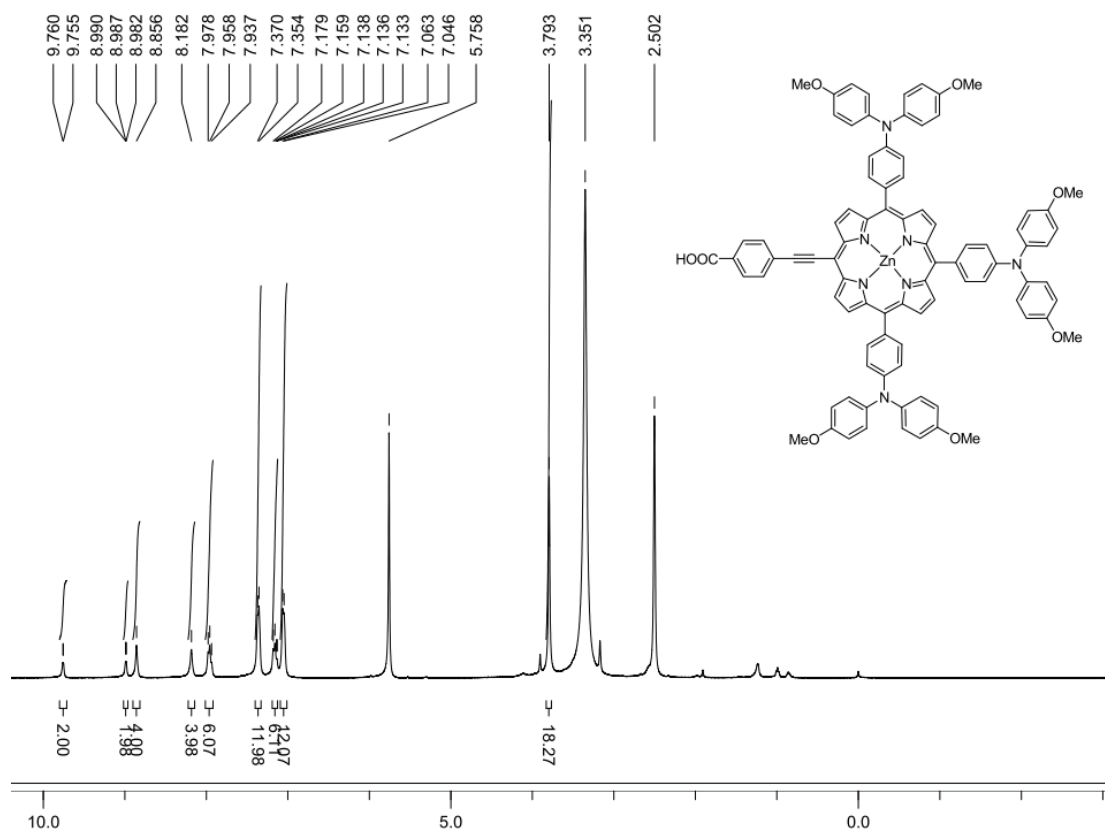

**Fig. 39** The  $^1\text{H}$  NMR spectrum of MT3P in  $\text{DMSO-}d_6$

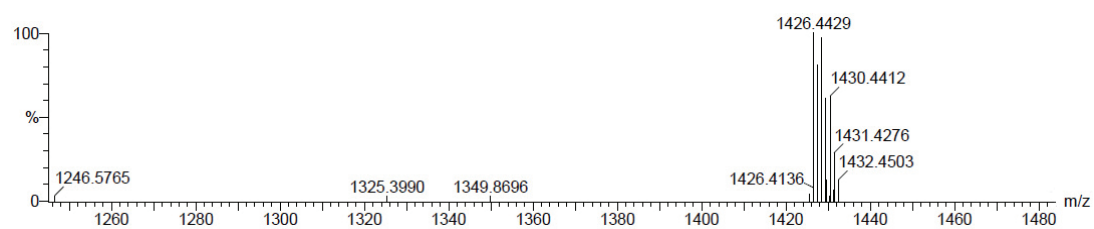

**Fig. 40** HRMS of MT3P in MeOH

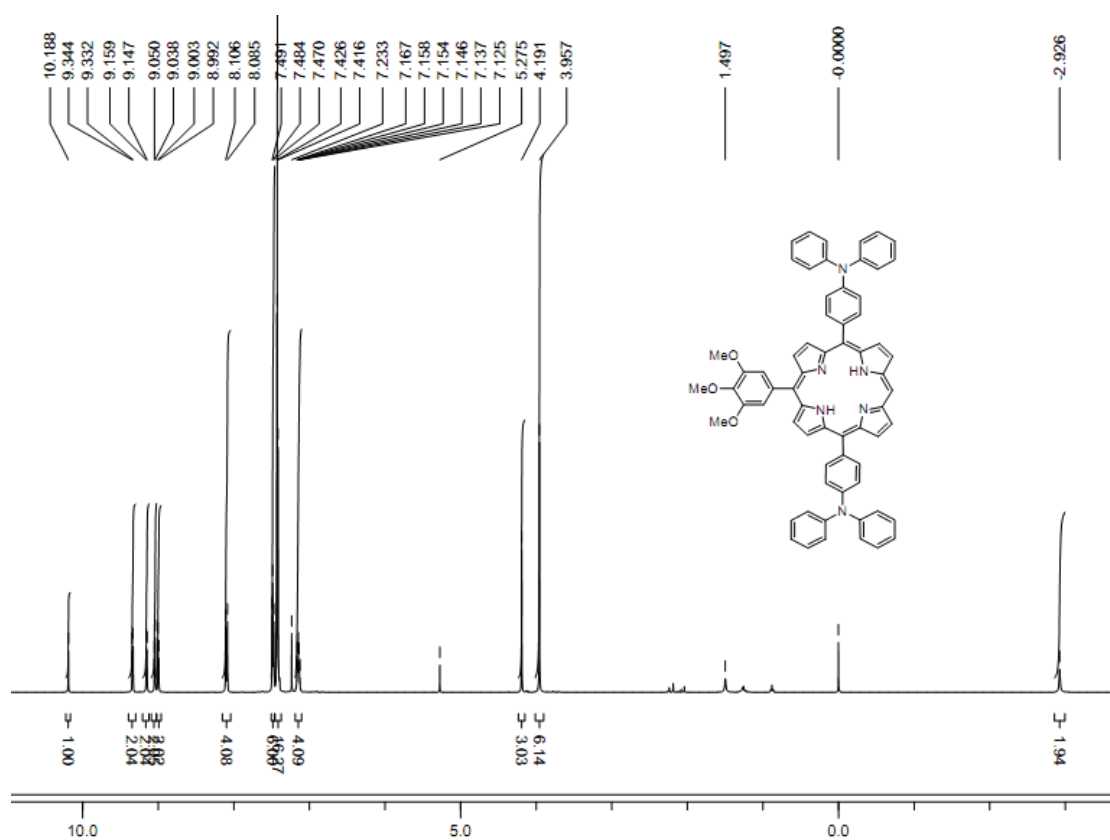

**Fig. 41** The  $^1\text{H}$  NMR spectrum of **1e** in  $\text{CDCl}_3$

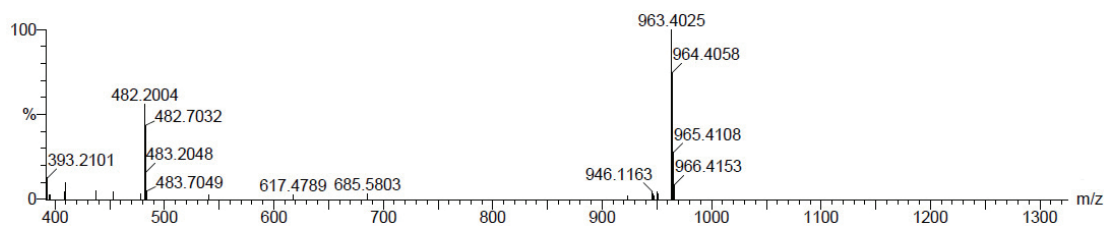

**Fig. 42** HRMS of **1e** in MeOH

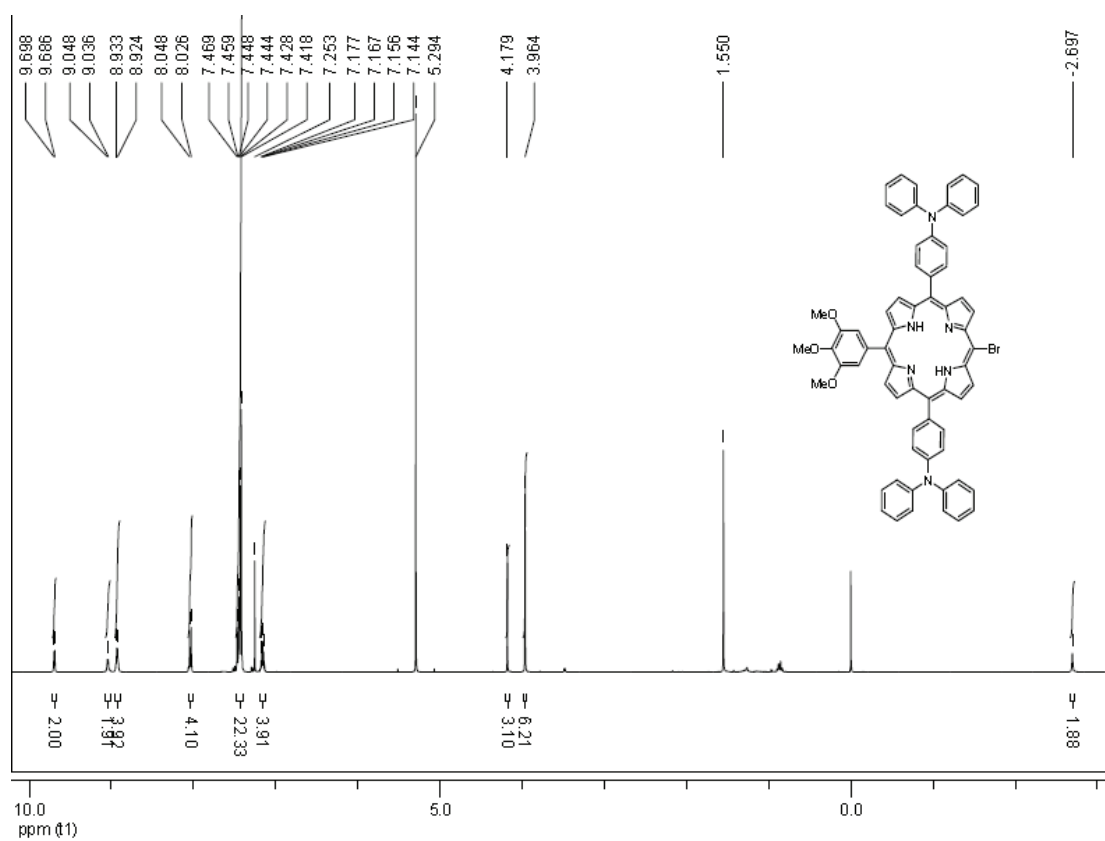

**Fig. 43** The  $^1\text{H}$  NMR spectrum of **2e** in  $\text{CDCl}_3$

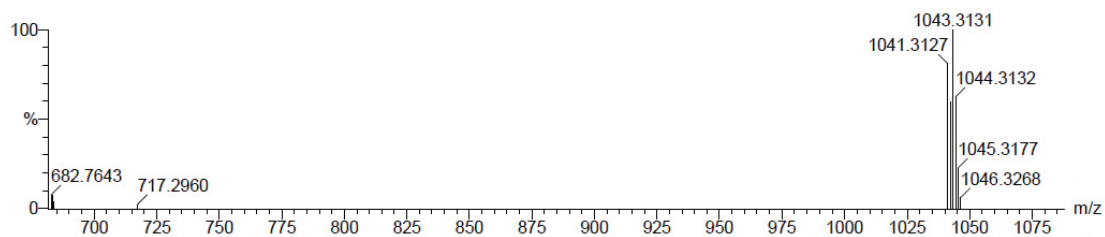

**Fig. 44** HRMS of **2e** in MeOH



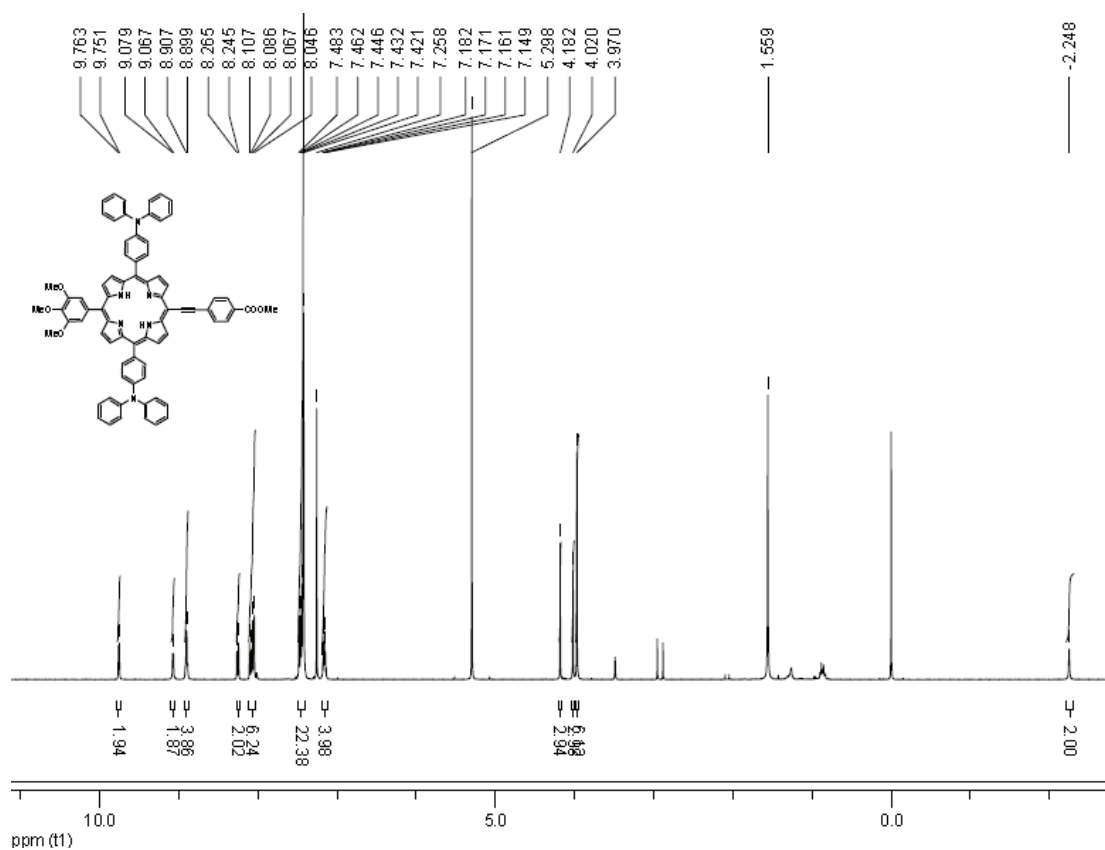

Fig. 45 The <sup>1</sup>H NMR spectrum of 3e in CDCl<sub>3</sub>

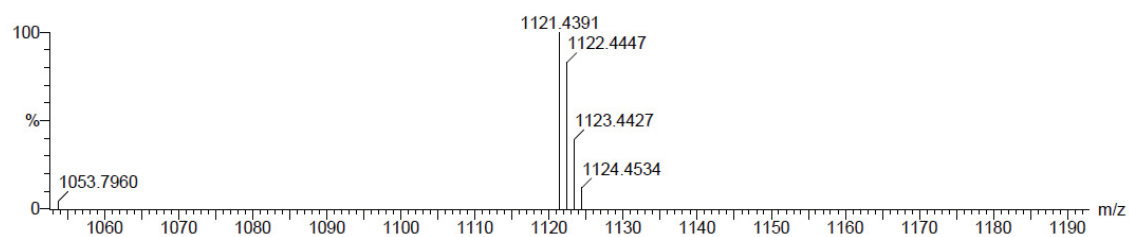

Fig. 46 HRMS of 3e in MeOH

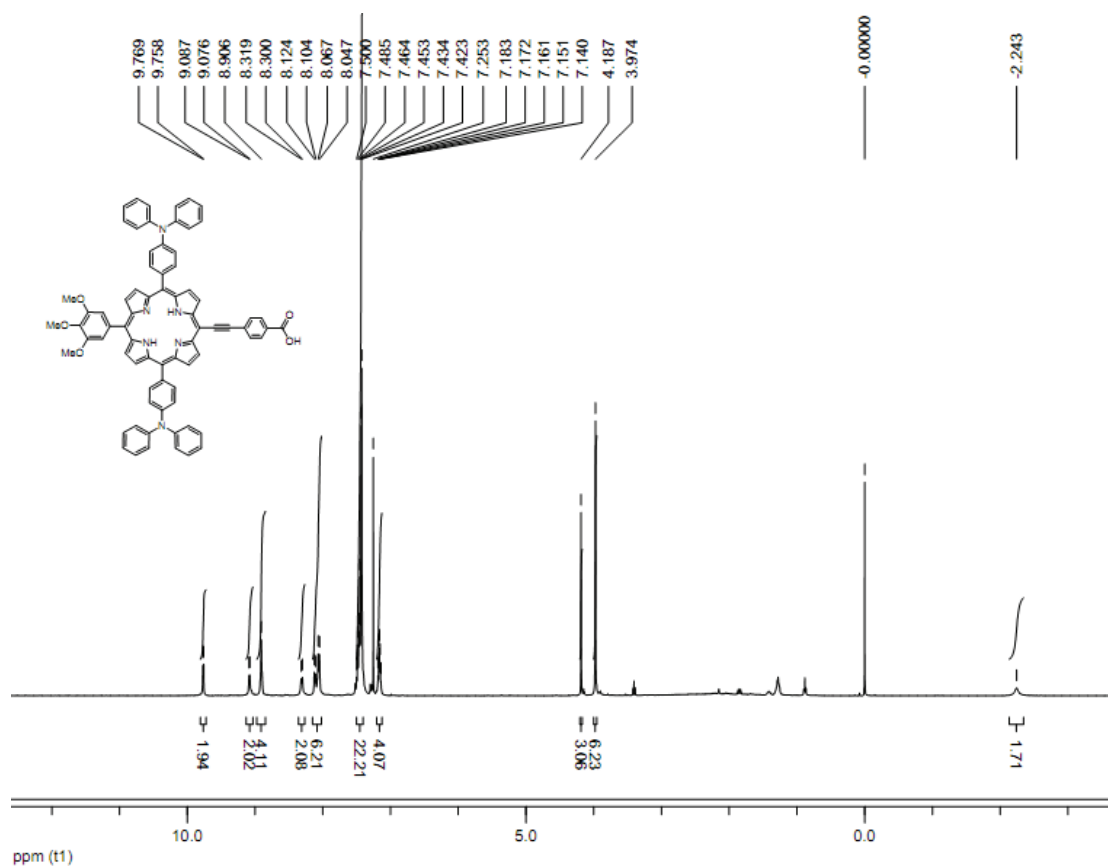

**Fig. 47** The <sup>1</sup>H NMR spectrum of **4e** in CDCl<sub>3</sub>

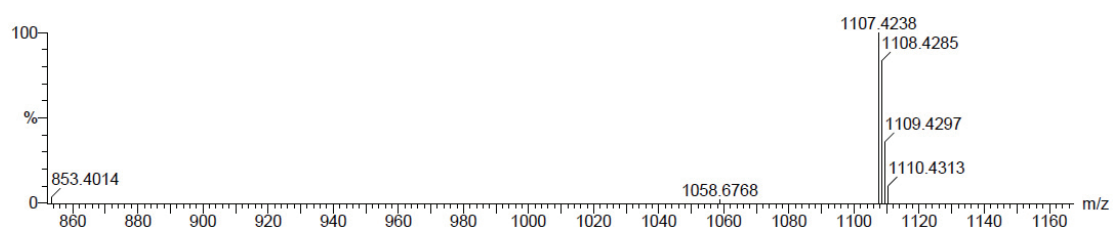

**Fig. 48** HRMS of **4e** in MeOH

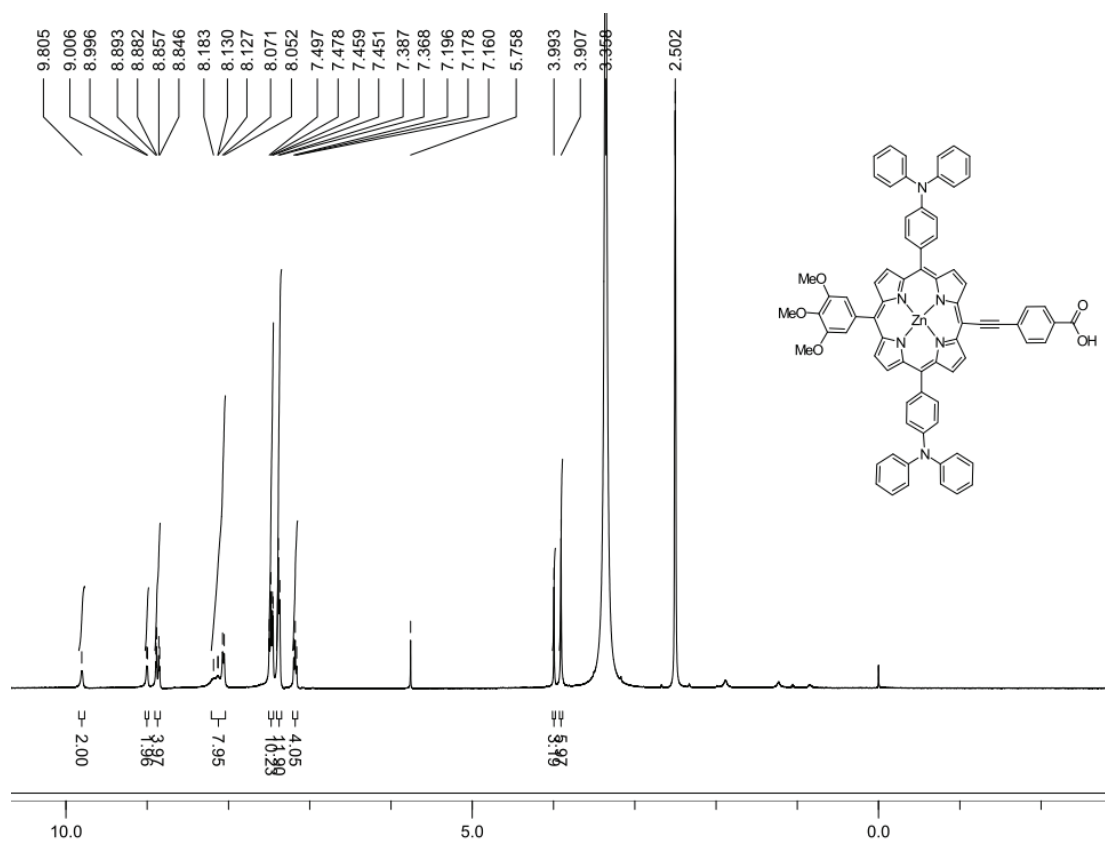

**Fig. 49** The  $^1\text{H}$  NMR spectrum of **M3T2P** in  $\text{DMSO-}d_6$

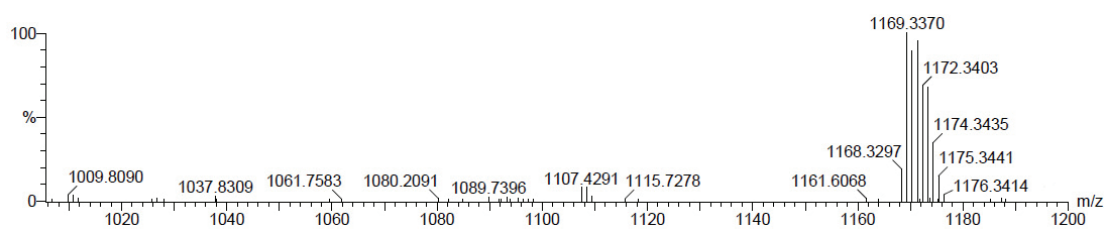

**Fig. 50** HRMS of **M3T2P** in MeOH

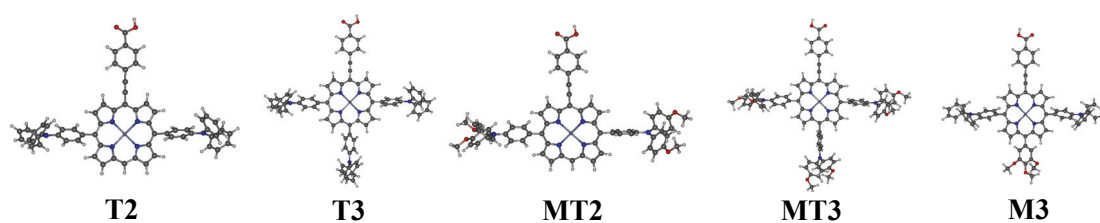

**Fig. 51** The optimized structures of **T2P**, **T3P**, **MT2P**, **MT3P** and **M3T2P** dyes
